# Supplementary material for: Runx1 is a central regulator of osteogenesis for bone homeostasis by orchestrating BMP and WNT signaling pathways
Source: PLoS Genet. 2021 Jan 21;17(1):e1009233. doi: 10.1371/journal.pgen.1009233 (PMC7819607; doi:10.1371/journal.pgen.1009233)
Supplement: S3 Table — (XLSX) [file pgen.1009233.s010.xlsx]

## Sheet: Sheet1
Table S3. Primers used for subcloning
Gene	Primer
Bmp7 F0	CCGACGCGTGAATGAAGCCATTGGGCCAG
Bmp7 F1	CCGACGCGTCACCATCCCCACTCACTCAC
Bmp7 F2	CCGACGCGTCAGGTGCCCTATCTCTCCCT
Bmp7 F3	CCGACGCGTTGTAGAGGCTTTAGCAGAGGC
Bmp7 F4	CCGACGCGTTAGAGGAGCCCAGAGGAACC
Bmp7 F5	CCGACGCGTGATGAGGTCCCACCTTGCTC
Bmp7 R	CCGCTCGAGGCTAGCACAGCAACTCCAGA
Alk3 F0	CGGGGTACCCTCCAGGCCAGAATGTGTGT
Alk3 F1	CGGGGTACCGGGCTTCTGGCTCTGTTCAT
Alk3 F2	CGGGGTACCCAGTTTCCTTGGCCGATCCT
Alk3 F3	CGGGGTACCGTGTCCCCTCTACTCCCCAT
Alk3 F4	CGGGGTACCGATTTGTGCGGGGCTGAGTG
Alk3 R	CCCAAGCTTCGAATTCCTCGGGCGTAAGATA
Atf4 F0	CCGACGCGTCCAGGCTGGAGTTGGAAAGA
Atf4 F1	CCGACGCGTACTGAGCAGTAAGTGGCAGG
Atf4 F2	CCGACGCGTGGGCCATATAGGAGCAGCTT
Atf4 F3	CCGACGCGTCTGAAACATGCCCTCCTGGT
Atf4 F4	CCGACGCGTCACAGGCAGCACCTGTAAGA
Atf4 F5	CCGACGCGTCCTTATGGCTGTCAGCGGAA
Atf4 R	CCGCTCGAGTGTTTCCAGAACCGAGTGGG
